# Supplementary material for: Co/SiO2 Catalyst for Methoxycarbonylation of Acetylene: On Catalytic Performance and Active Species
Source: MDPI journal article supplement (doi:10.3390/molecules29091987), 2024-04-26
Supplement: s1 [file s1]

# Supplementary Information

## Figures S1–S4

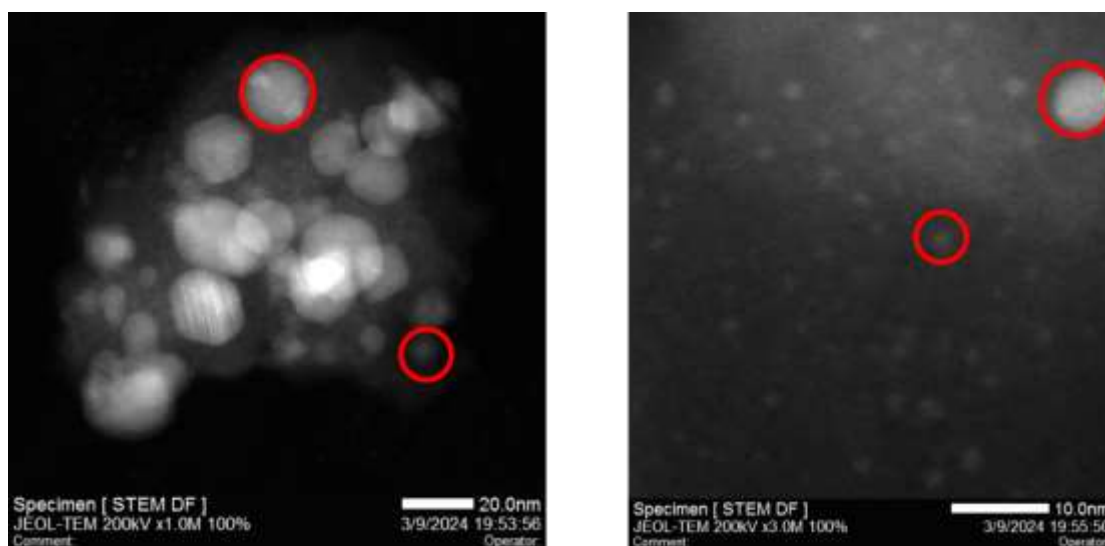

**Figure S1.** STEM images of Co/SiO<sub>2</sub> at different magnifications.

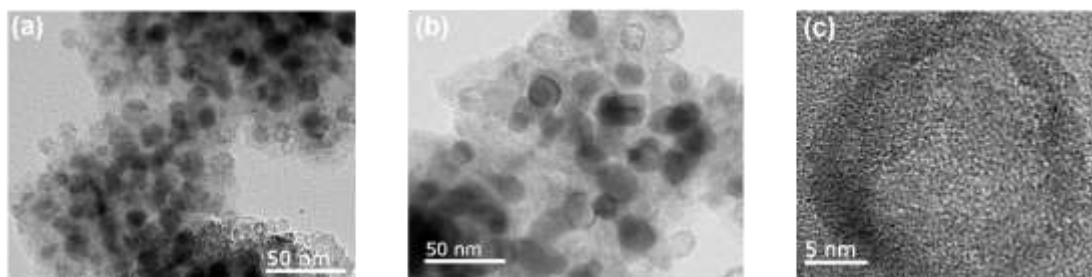

**Figure S2.** (a-c) TEM images of pre-activated Co/SiO<sub>2</sub>-H<sub>2</sub>.

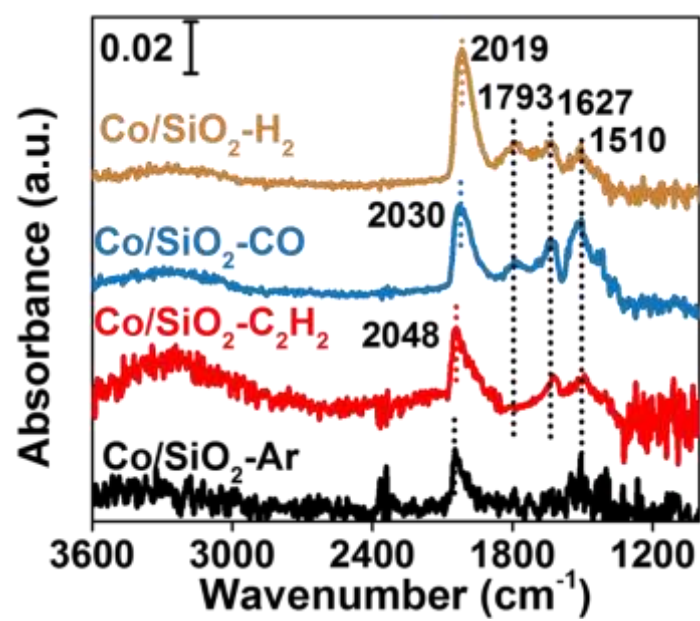

Figure S3. DRIFTS spectra of CO adsorption on different samples.

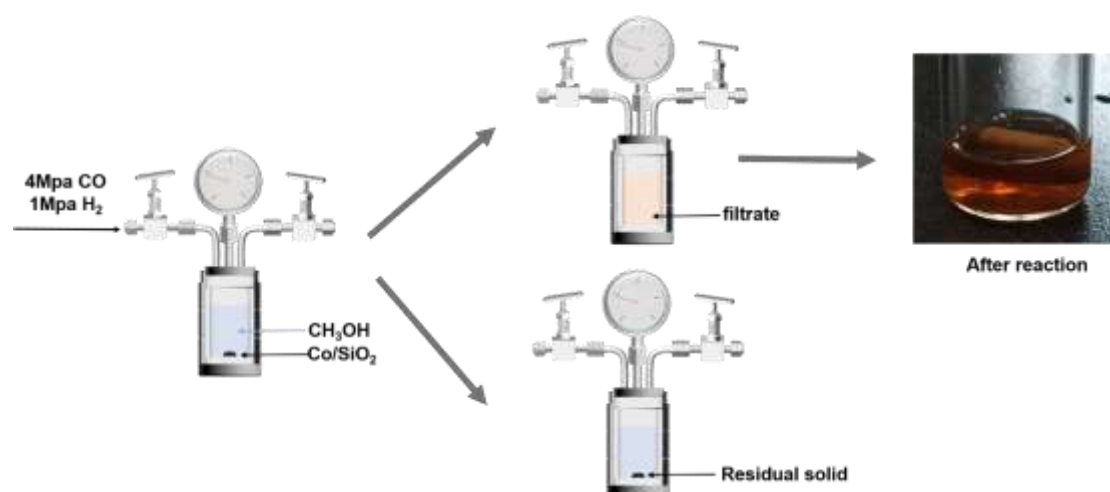

**Figure S4.** Diagram illustration of separation process.
